# Supplementary material for: The influence of Sc substitution on the crystal structure and scintillation properties of LuBO3:Ce3+ based on a combinatorial materials chip and high-throughput XRD
Source: Royal Society of Chemistry journal article supplement (doi:10.1039/d1tc01657a), 2021-01-01
Supplement: d1tc01657a1.pdf [file d1tc01657a1.pdf]

# **The influence of Sc substitution on the crystal structure and scintillation properties of LuBO<sub>3</sub>:Ce<sup>3+</sup> based on combinatorial material chip and high-throughput XRD**

*Shan-Shan Liang<sup>a</sup>, Meng Huang<sup>a</sup>, Yu Wang<sup>a</sup>, Qian-Li Li<sup>a</sup>, Xin-Xin Yang<sup>a</sup>, Jing-Tai Zhao<sup>b</sup>, Xing-Yu Gao<sup>c</sup>, Guang-Zhi Yin<sup>c</sup>, Qian Liu<sup>d</sup>, Zhi-Jun Zhang<sup>a\*</sup>*

<sup>a</sup> School of Materials Science and Engineering, Shanghai University, Shanghai 200444, China.

E-mail: zhangzhijun@shu.edu.cn

<sup>b</sup> School of Materials Science and Engineering, Guilin University of Electronic Technology, Guilin 541004, China.

<sup>c</sup> Chinese Academy of Science, Shanghai Advance Research Institute, SSRF, Shanghai, 200120, China.

<sup>d</sup> Shanghai Institute of Ceramics, Chinese Academy of Sciences, Shanghai 200050, China.

**KEYWORDS:** combinatorial material technology, LuBO<sub>3</sub>:Ce, scandium, high-throughput XRD, scintillation.

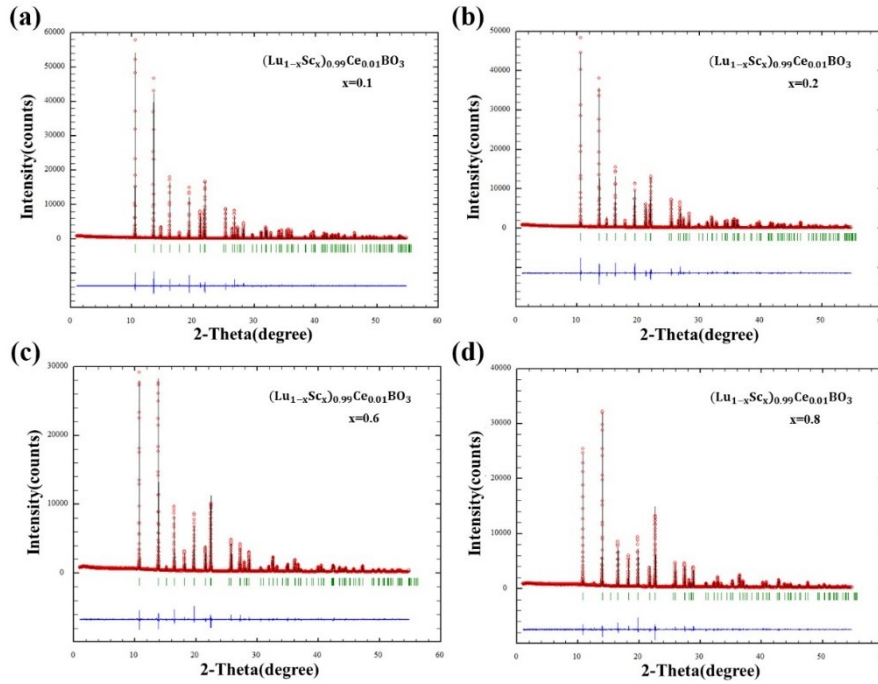

Fig. S1. Rietveld refinement patterns of LSBO:Ce for  $x = 0.1$  (a),  $x = 0.2$  (b),  $x = 0.6$  (c) and  $x = 0.8$  (d).

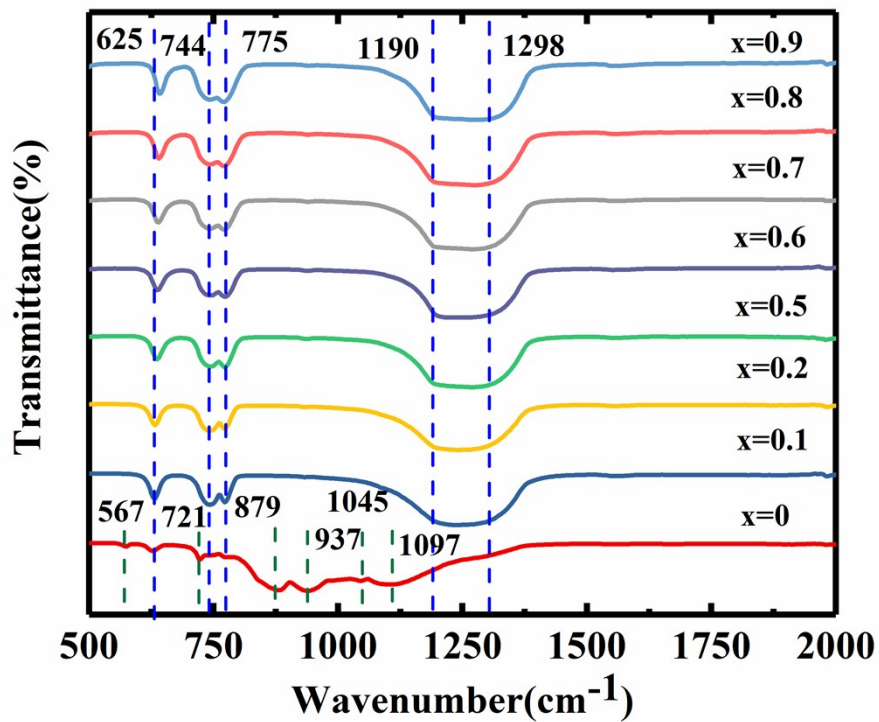

Fig. S2 FT - IR spectra of LSBO:Ce ( $x = 0 - 0.9$ ).

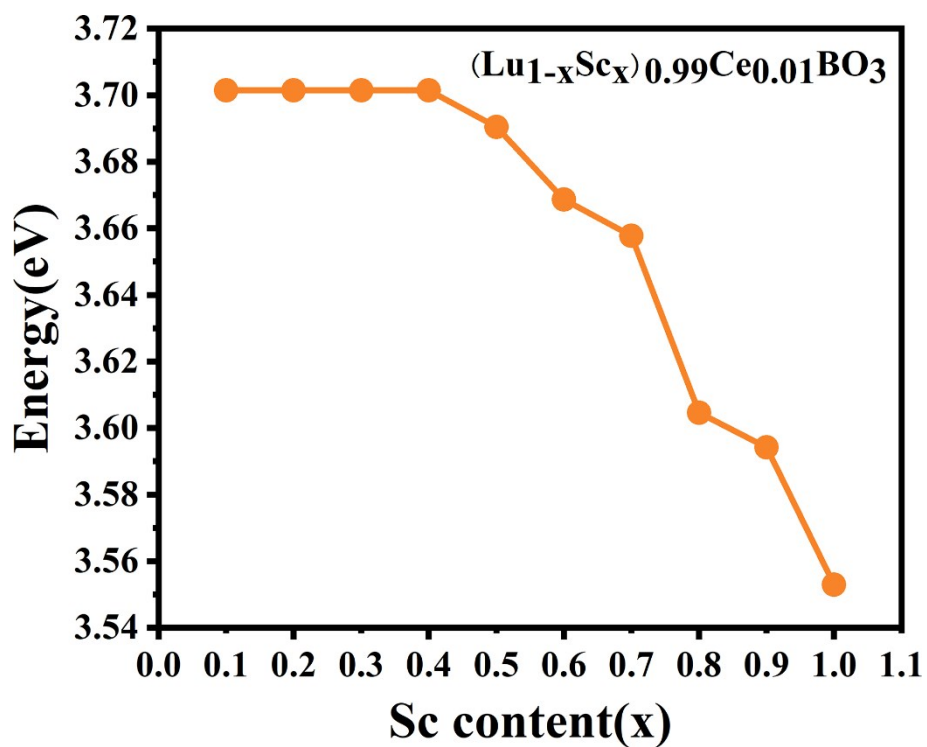

Fig. S3 Energy between the lowest 5d and 4f energy levels of LSBO:Ce.

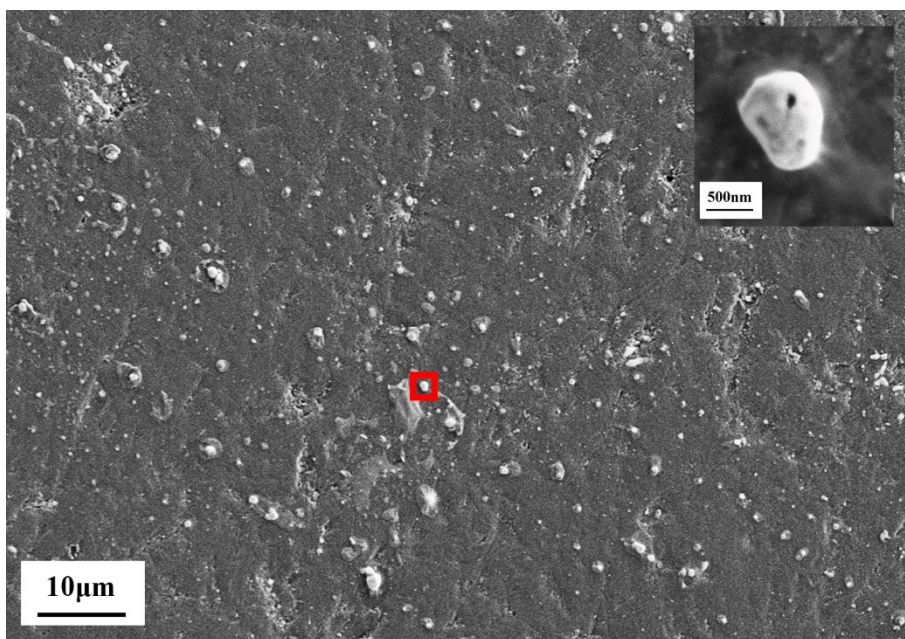

Fig. S4 SEM image of the LSBO:Ce @ PMMA scintillation screen with 7 wt% content of LSBO:Ce, the inset shows a single particle.
